# Supplementary material for: Oldenlandia diffusaPromotes Antiproliferative and Apoptotic Effects in a Rat Hepatocellular Carcinoma with Liver Cirrhosis
Source: Hindawi journal article supplement (doi:10.1155/2015/501508), 2015-01-01

Table 1. Primer sequences of real time-polymerase chain reaction (RT-PCR)

| <b>Primer</b> | <b>Forward</b>                 | <b>Reverse</b>                 |
|---------------|--------------------------------|--------------------------------|
| CXCR1         | 5'-CTGGTGATGCTGGTCATCTTAT-3'   | 5'-CAAGGTCAGGGCAAAGAGTAG-3'    |
| CXCR2         | 5'-ACTCATCCAATGTTAGCCCAG-3'    | 5'-GGTGAATCCGTAGCAGAACAG-3'    |
| CXCR4         | 5'-AGGGAACTGAACATTCCAGAGCGT-3' | 5'-AAACGTTCCACGGGAATGGAGAGA-3' |
| GAPDH         | 5'-ACACTCACGCGCATCTTC-3'       | 5'-CCACTTTACCAGAGTTAAAAGCAG-3' |

CXCR1, CXC chemokine receptor 1; CXCR2, CXC chemokine receptor 2; CXCR4, CXC chemokine receptor 4; GAPDH, glyceraldehyde-3-phosphate dehydrogenase.

# Supplementary Figure 1.

**A**

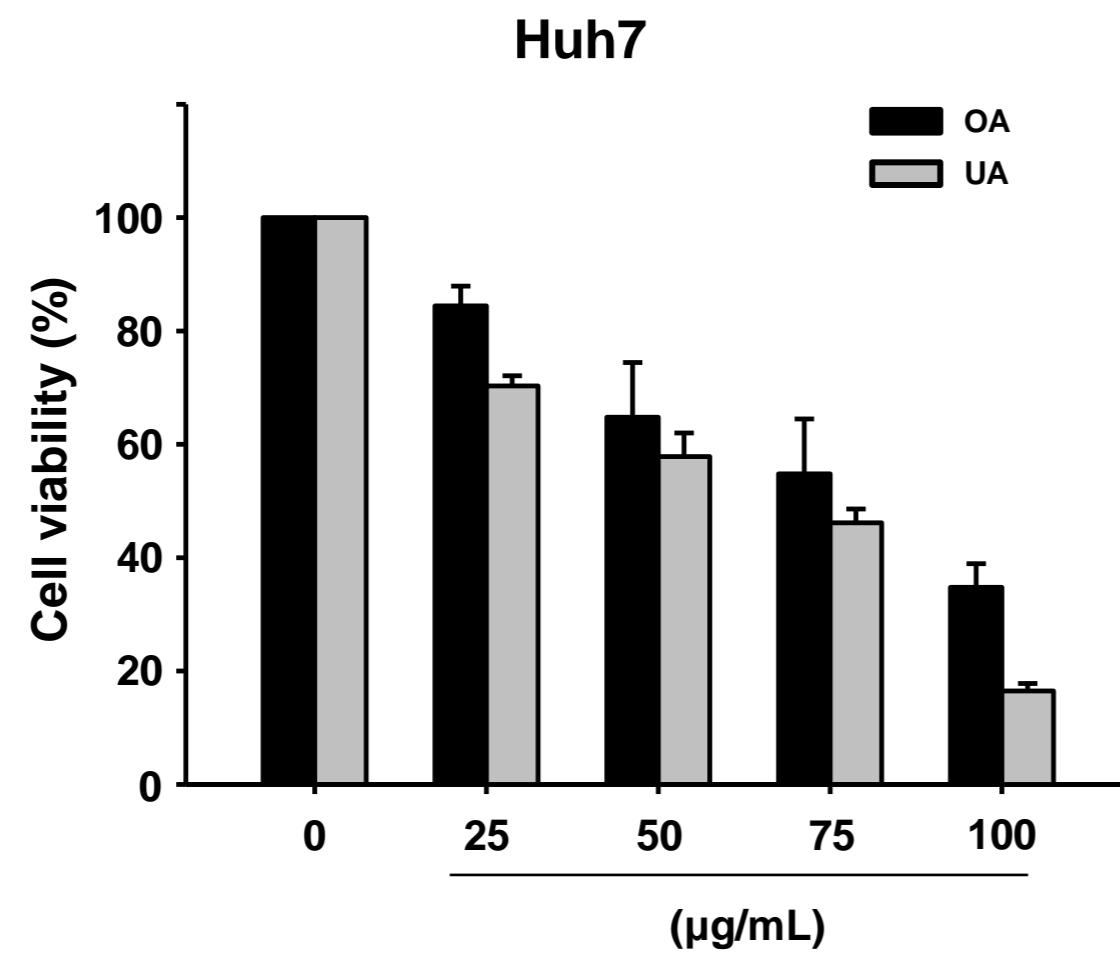

**B**

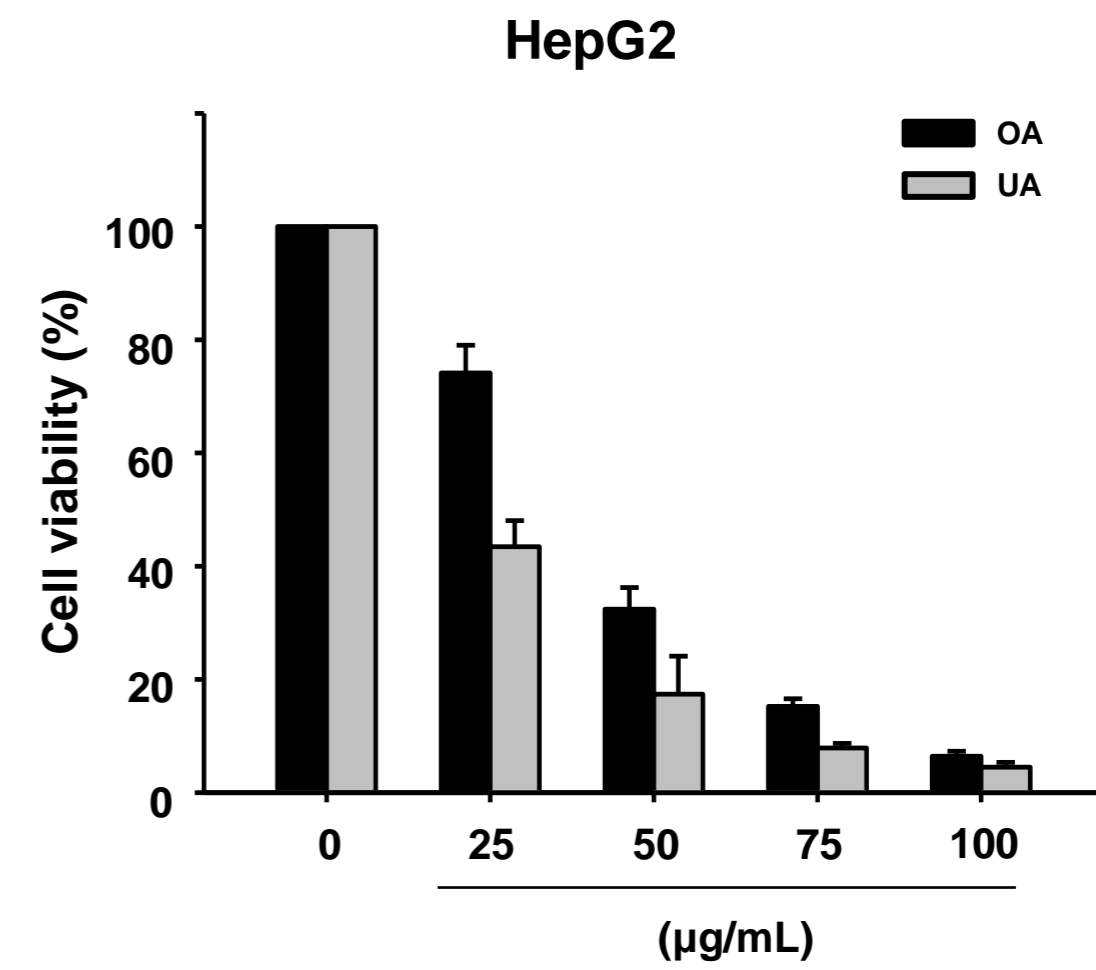

**C**

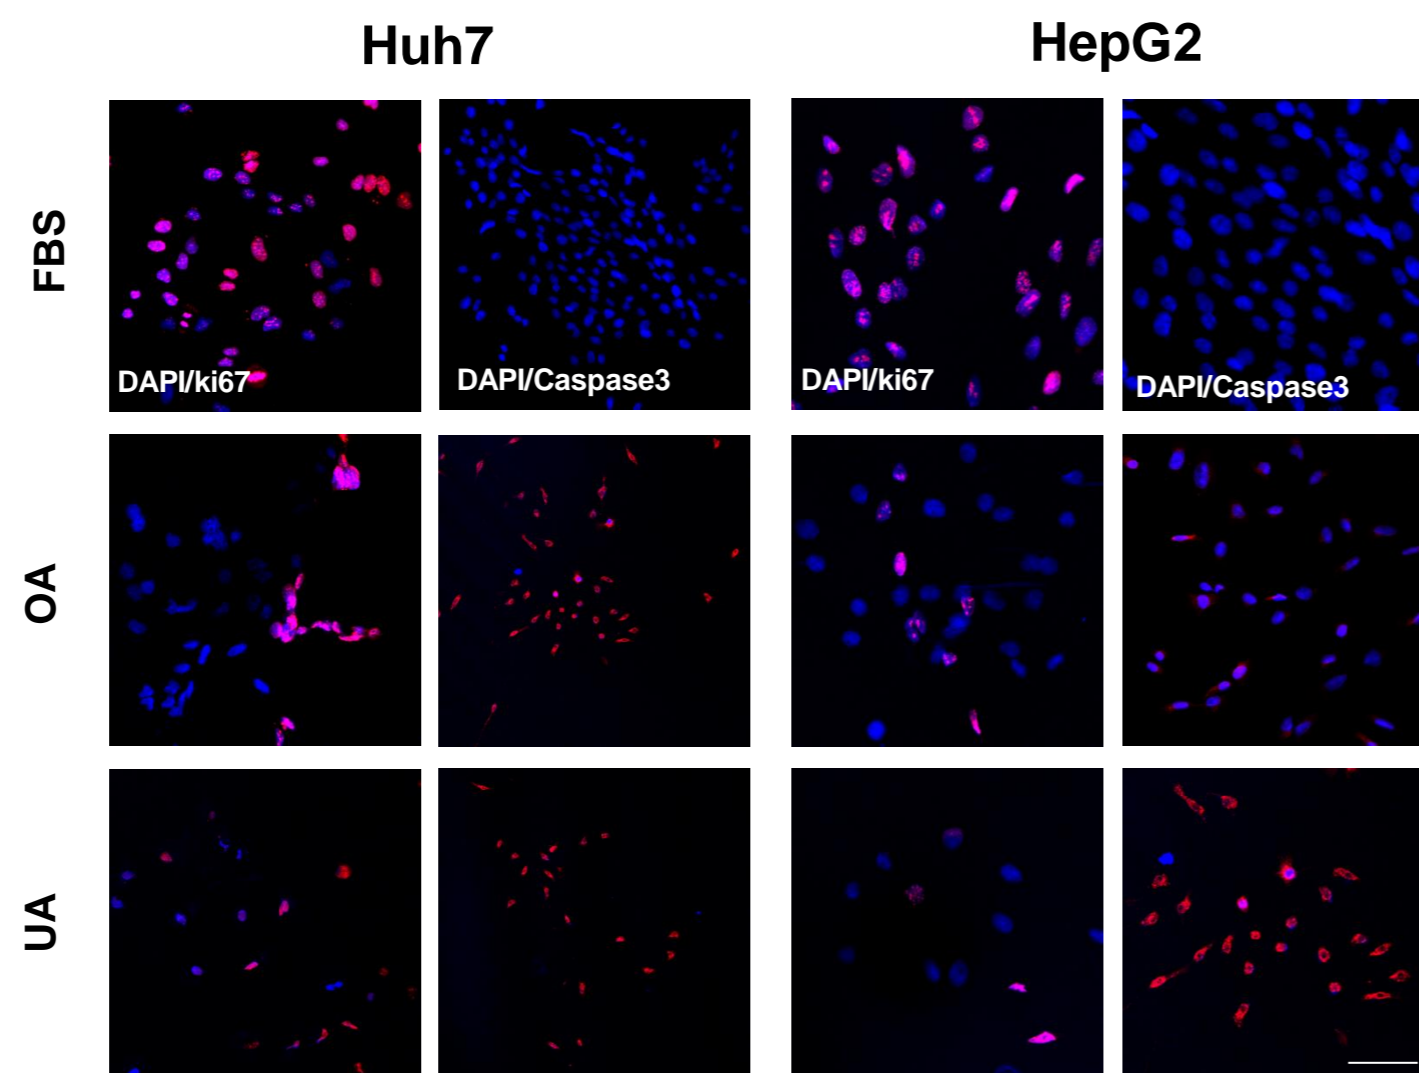

**D**

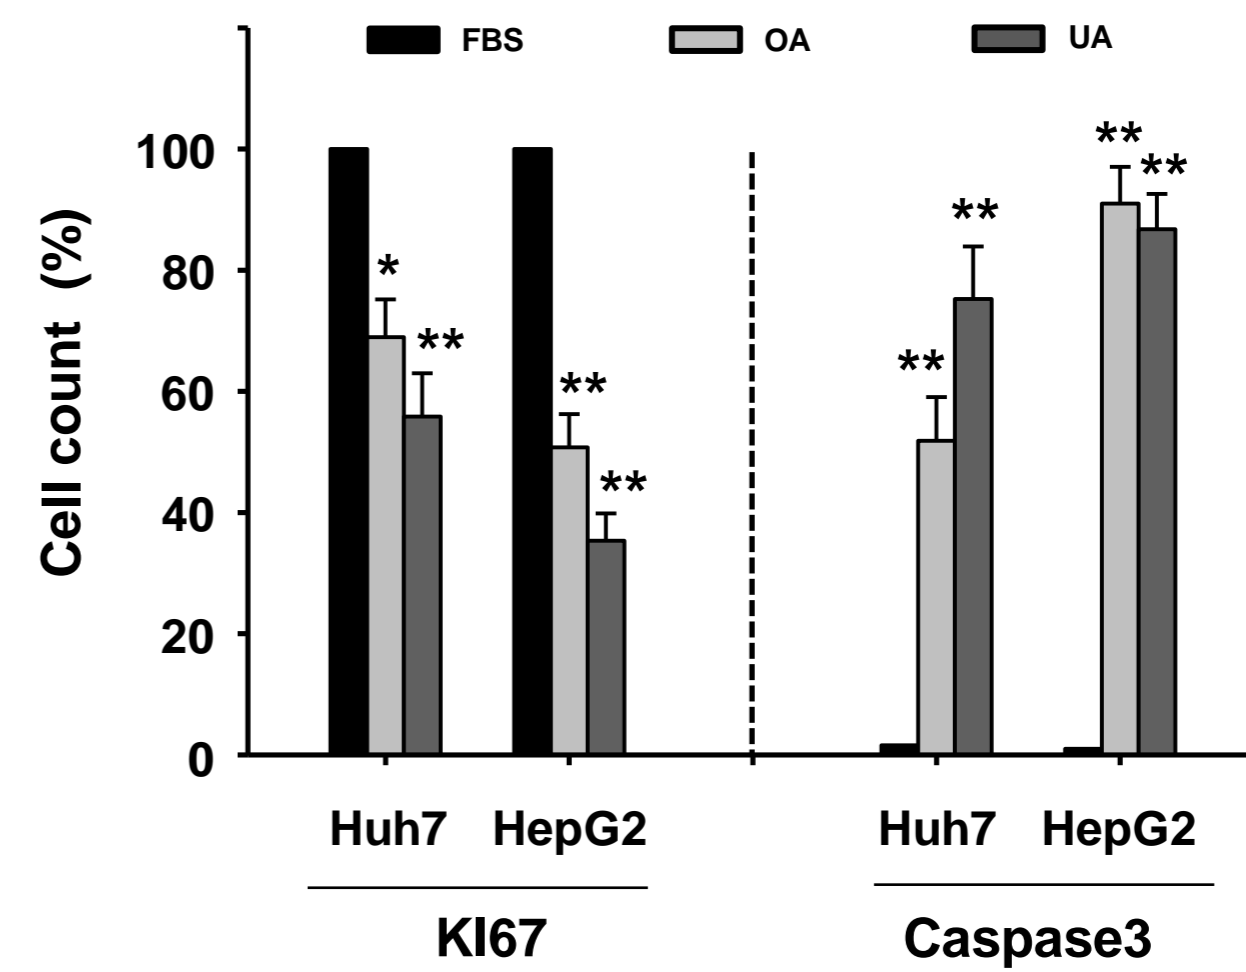

# Supplementary Figure 2.

## A

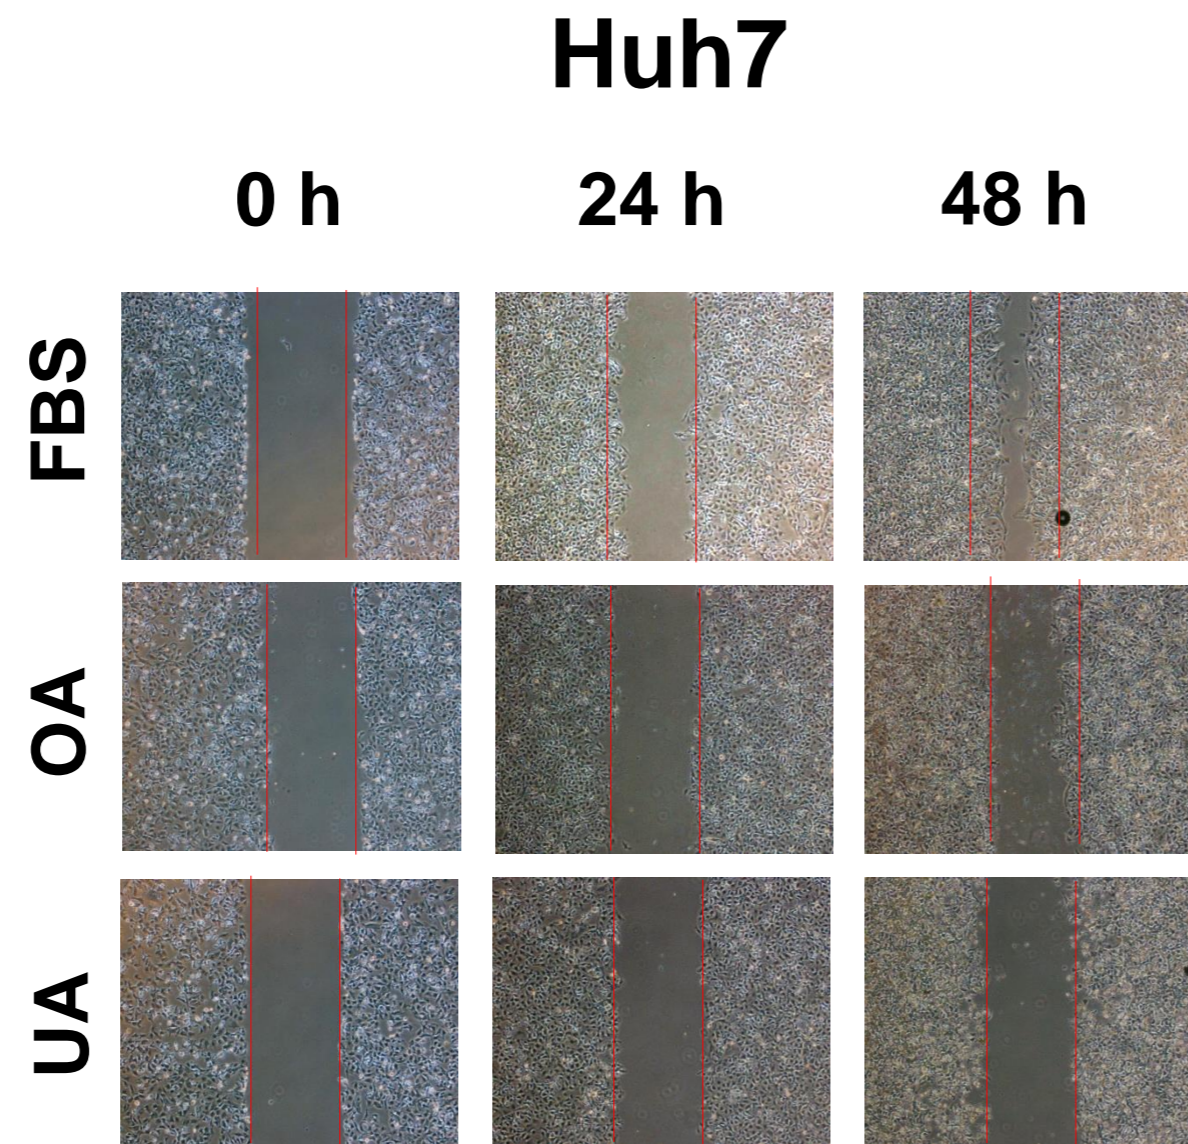

## B

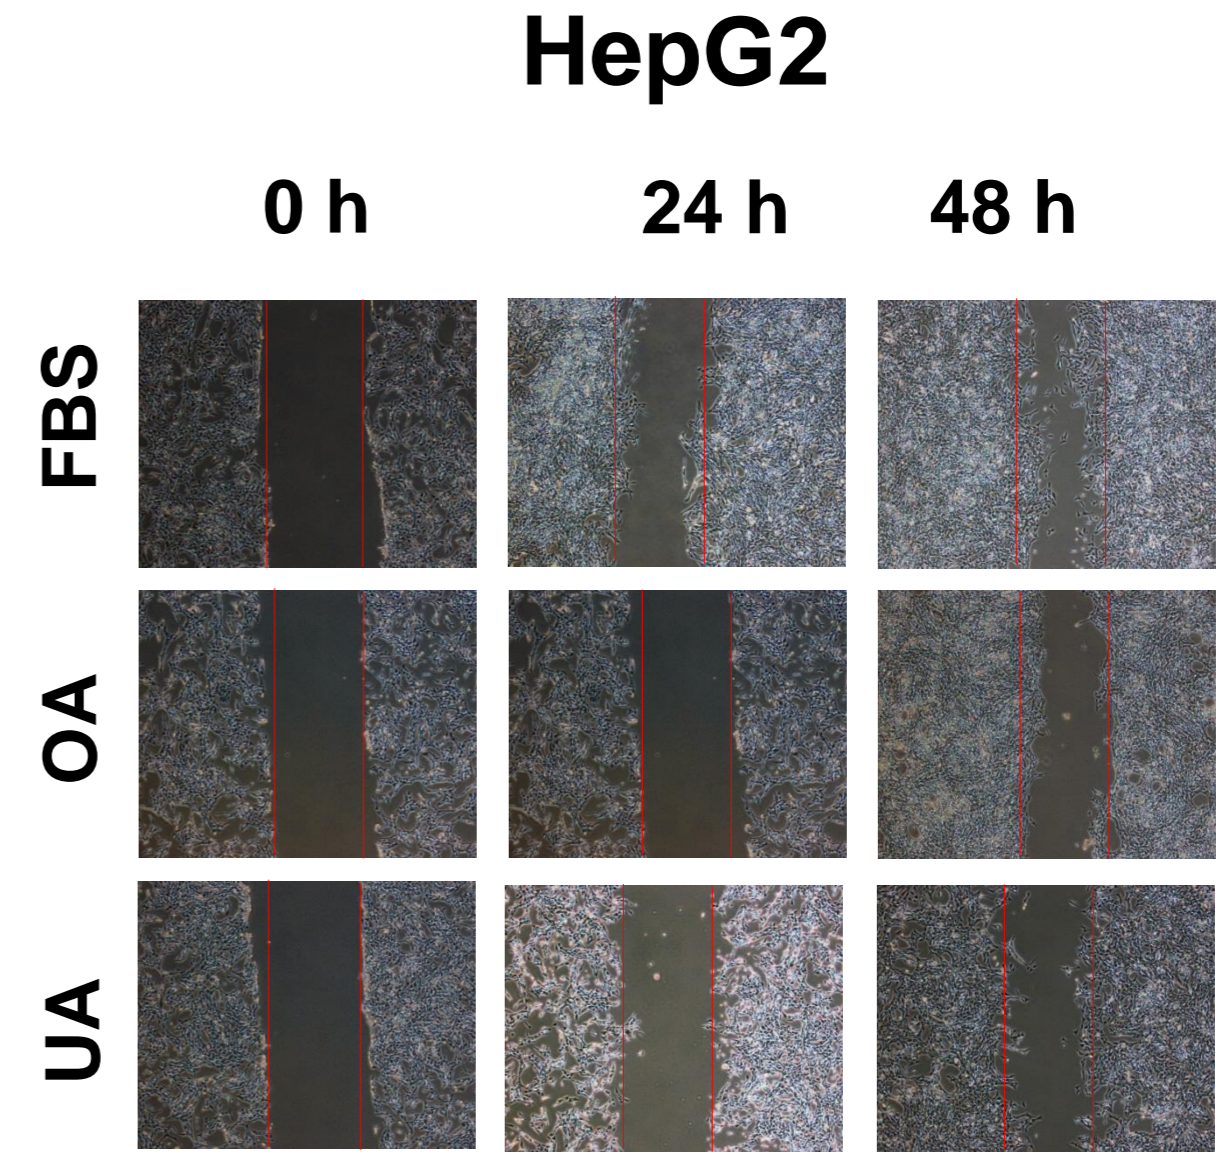

## C

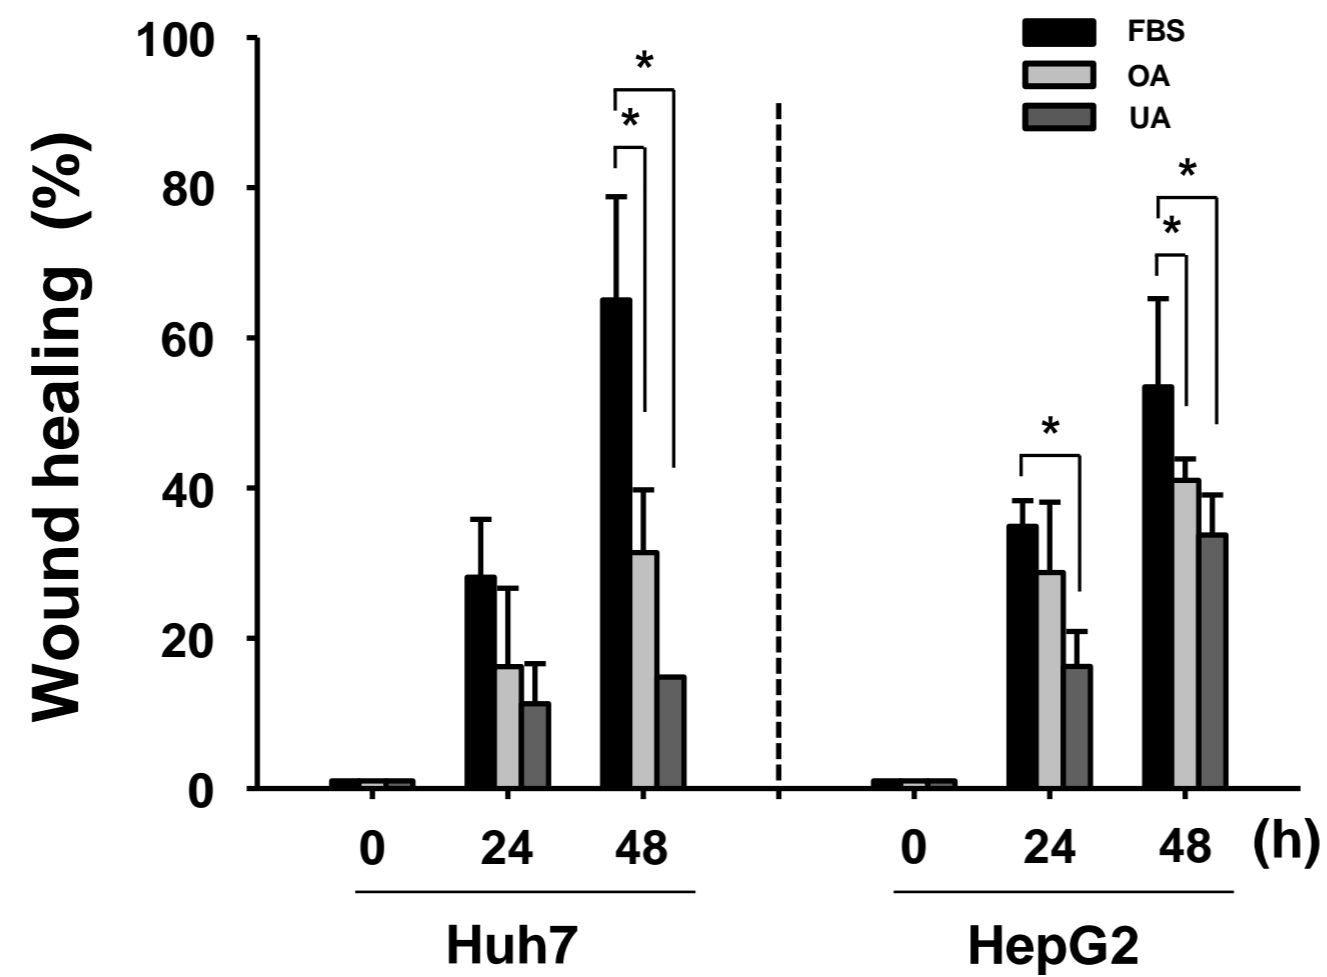

## D

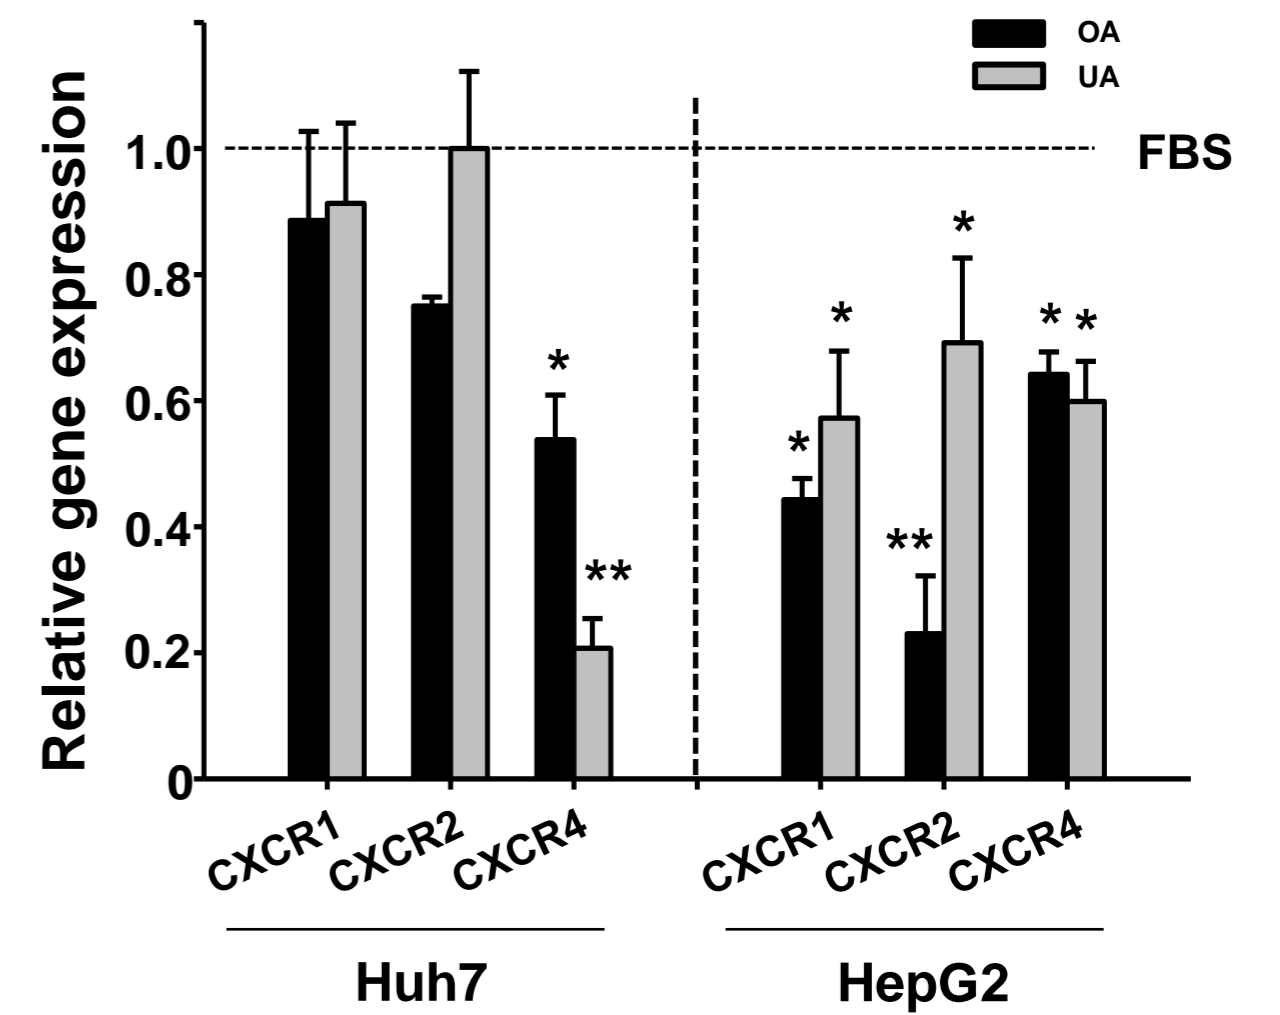

Supplement: f1 [file 501508.f1.pdf]
